# Supplementary material for: The Entourage Effect in Cannabis Medicinal Products: A Comprehensive Review
Source: Preprints.org preprint supplement (doi:10.20944/preprints202409.1225.v1), 2024-09-16
Supplement: Supplementary file 1 [file supplementary]

**Table S1**. Selected *Cannabis sativa* L.-derived cannabinoids, their targets, mechanisms of action, and potential resultant pharmacological effects – Table adapted from (Christensen et al., 2023)

| **Structures** | **Targets** | **Mechanisms of Action** | **Potential Pharmacological effects** |
| --- | --- | --- | --- |
| 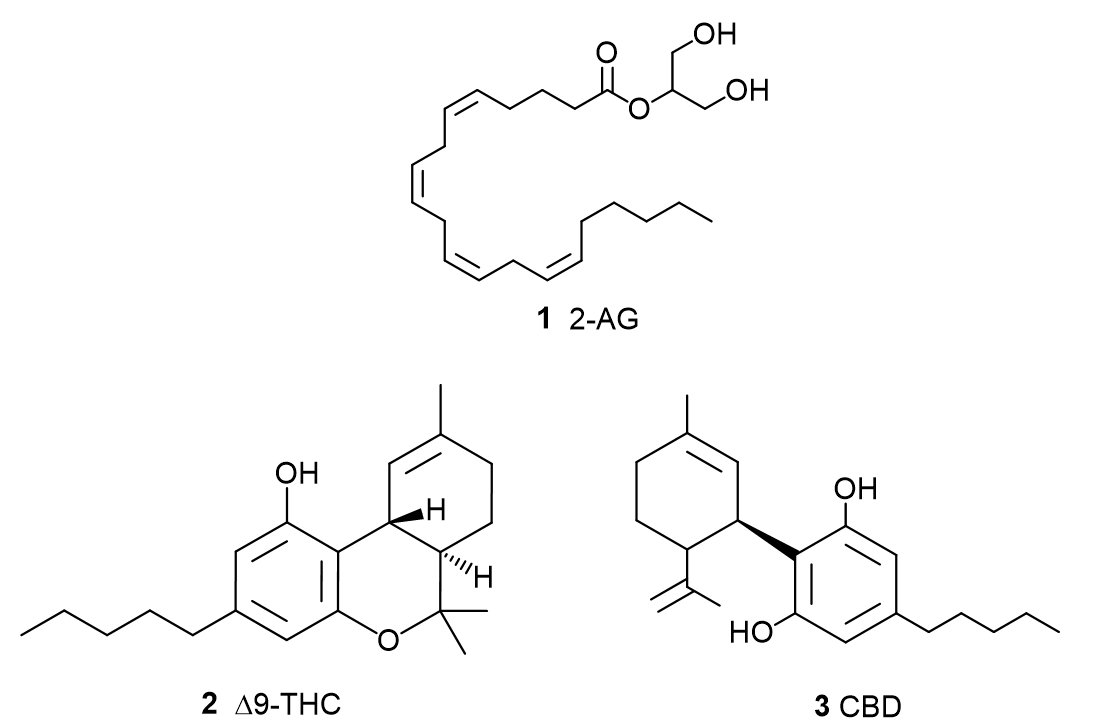**Δ9‑Tetrahydrocannabinol (THC) (2)** | CB1 | Partial agonist | Analgesic **, ***  Anti-convulsant **  Anti-epileptic **  Sleep improvement **, ***  Anti-anorectic **, ***  appetite stimulating **, ***  Anti-emetic **, ***  Anxiolytic ** |
| CB2 | Partial agonist | Analgesic **, *** |
| GPR55 | Agonist | Not reported |
| GPR18 | Agonist | Not reported |
| 5-HT-3A | Antagonist | Anti-nociception *  Anti- emetic * |
| DOR | Negative allosteric modulator | Not reported |
| MOR | Negative allosteric modulator | Not reported |
| PPAR-y | Agonist | Anti-cancer, anti-proliferative *, ** |
| GlyR | Agonist | Analgesic *, ** |
| TRPV2 | Agonist | Not reported |
| TRPV3 | Agonist | Not reported |
| TRPV4 | Agonist | Not reported |
| TRPA1 | Agonist | Not reported |
| TRPM8 | Antagonist | Not reported |
| **Cannabidiol (CBD) (3)**  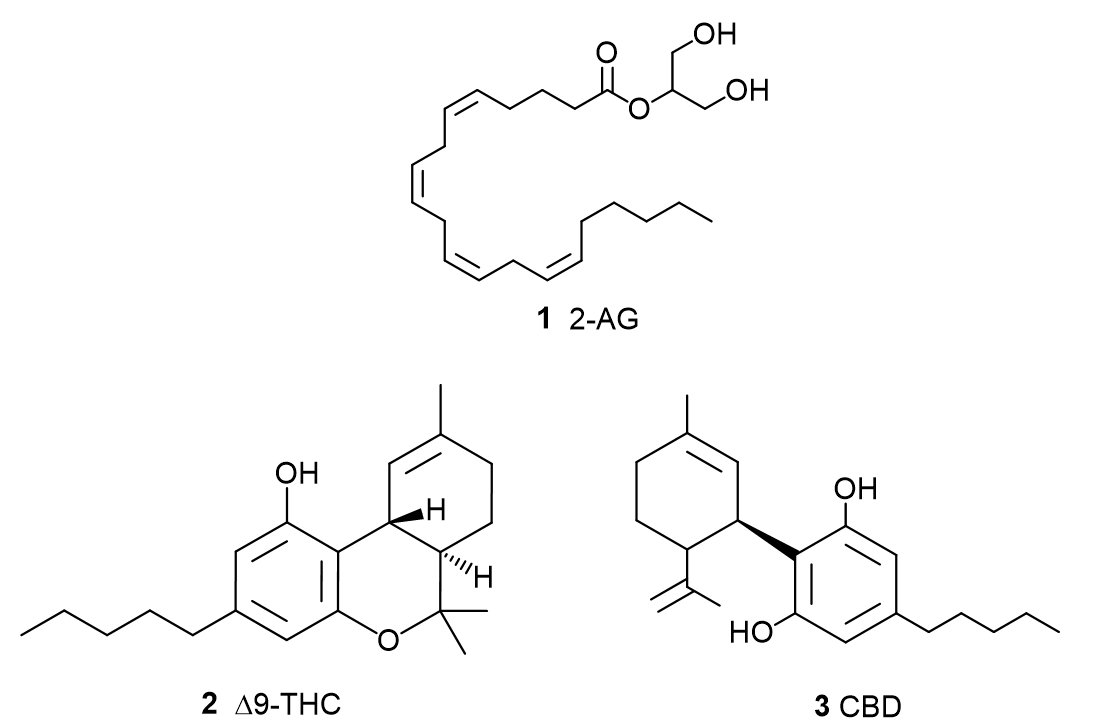  **Cannabidiol (CBD) (3)**  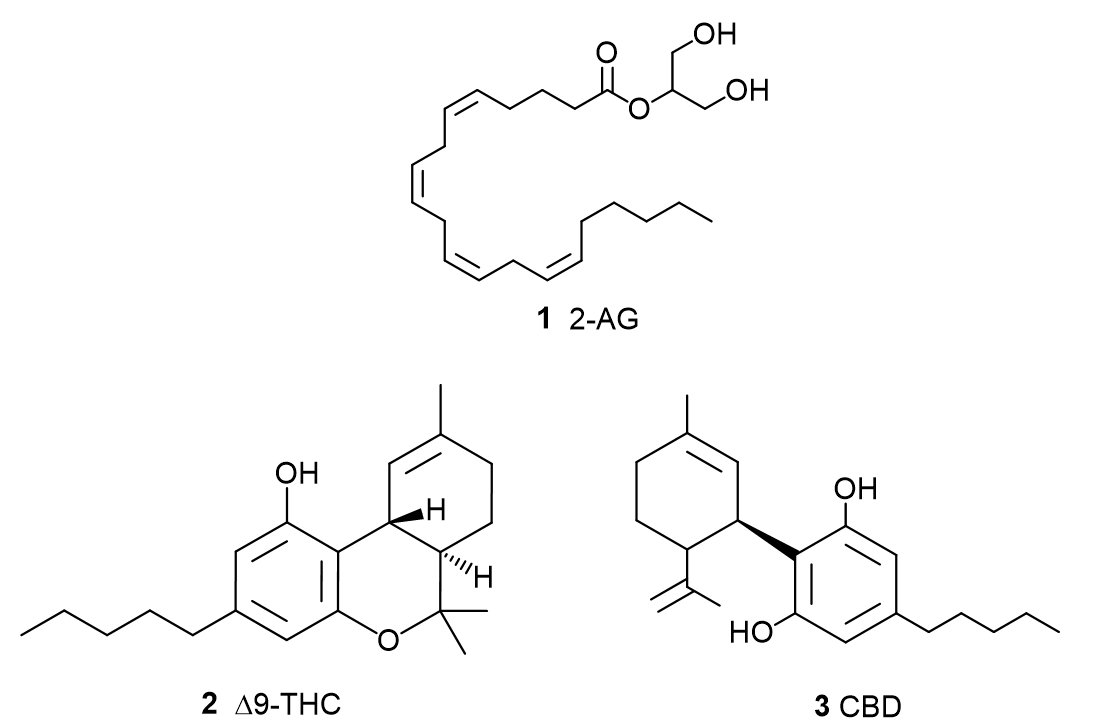  **Cannabidiol (CBD) (3)**  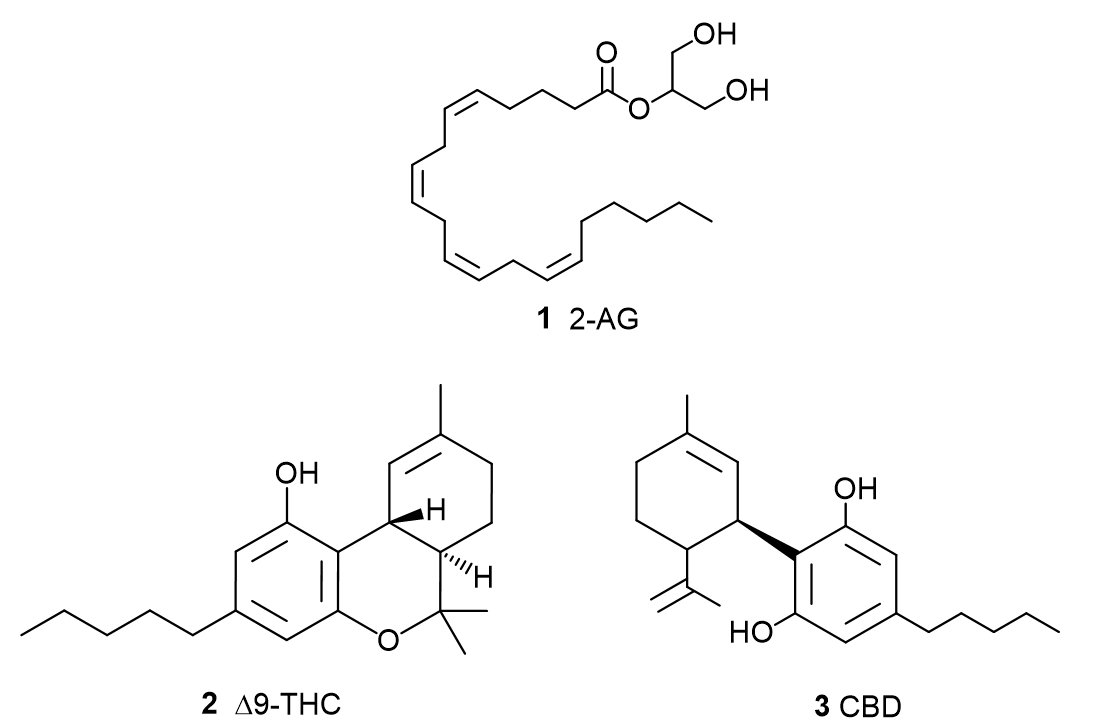  **Cannabidiol (CBD) (3)** | CB1 | Negative allosteric modulator  Antagonist | THC-related adverse effects modulation **, ***  Anxiolytic **  Antidepressant **  Vasorelaxant ** |
| CB2 | Partial agonist  Negative allosteric modulator  Antagonist | Seizure reduction **  Anti-epileptic **  Anti-inflammatory **  Anti-cancer *, **  Body weight decrease **  Neuroprotection ** |
| GPR3 | Inverse agonist | Alzheimer’s disease improvement * |
| GPR6 | Inverse agonist | Parkinson’s disease improvement * |
| GPR12 | Inverse agonist | Anti-cancer * |
| GPR55 | Antagonist | Anti-epileptic **, ***  Seizure dampening **  Bone resorption inhibition **  Parkinson’s motor skills improvement **  Cancer cell migration inhibition |
| FAAH | Inhibitor | AEA increase and related effects *  Sleep induction *, **  Stress reduction ***  Anxiolytic ***  Anti-depressant ** |
| 5-HT-1A | Agonist  Inverse agonist | Anti-emetic *, **  Analgesic **  Chemotherapy induced neuropathic pain reduction *, **  Anxiolytic **  Anti-depressant **  Cognitive performance improvement **  Anti-epileptic *, **, ***  Seizure reduction **  Anti-stress **  Neuroprotection ** |
| 5-HT-3A | Antagonist | Anti-emetic **  Cardiovascular effects ** |
| A1A | Agonist | Anti-arrhythmic **  Analgesic ** |
| A2A | Agonist | Anti-inflammatory *, **  Cognitive performance improvement ** |
| PPAR-*γ* | Agonist | *β*-amyloid-induced neuroinflammation reduction *, **  Hippocampal neurogenesis *, **  Alzheimer’s disease improvement *, ** |
| Immune cell (not further specified) | Inhibitor  Activator | Anti-inflammatory *, **  Immunosuppressive *, **  Cytokine release reduction/increase *, **  Anti-arthritic **  Multiple sclerosis amelioration ** |
| Gly-*α1* | Positive allosteric modulator  Agonist | Anti-inflammatory *  Neuroprotective * |
| Gly-*α*3 | Positive allosteric modulator | Analgesic ** |
| GABA-A | Positive allosteric modulator | Anti-convulsant **  Anti-epileptic ** |
| TRPV1 | Agonist | Neuron anti-hyperexcitability *  Anxiolytic **  Anti-cancer, apoptosis *  Microglial phagocytosis enhancement *  Cardiovascular effects ** |
| TRPV2 | Agonist | Microglial phagocytosis enhancement * |
| TRPV3 | Agonist | Not report |
| TRPV4 | Agonist | Not report |
| TRPA1 | Agonist | Analgesic ** |
| TRPM8 | Antagonist | Not reported |
| DOR | Negative allosteric modulator | Not reported |
| MOR | Negative allosteric modulator | Not reported |
| D2 | Partial agonist | Anti-psychotic* |
| 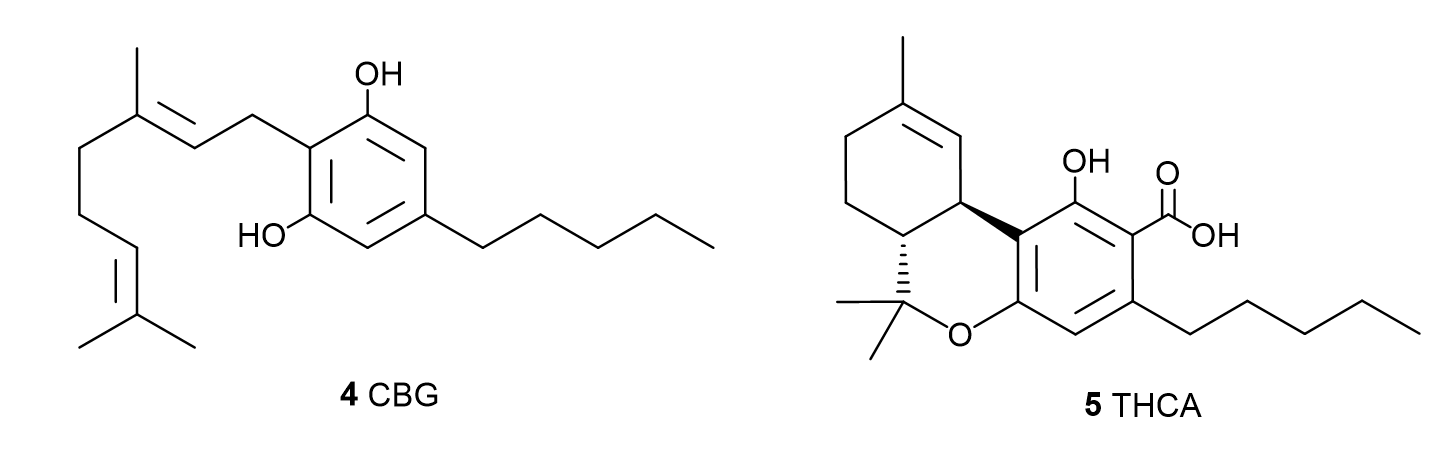  **Cannabigerol (CBG) (4)** | CB2 | Partial agonist | Anti-inflammatory *, **  Colitis attenuation *, ** |
| AEA uptake | Inhibitory | Various effects related to AEA * |
| 5-HT-1A | Antagonist | Reverse anti-emetic effect of, *e.g.* CBD ** |
| A2A | Agonist | Not reported |
| TRPV1 | Agonist | Not reported |
| TRPA1 | Agonist | Not reported |
| TRPM8 | Antagonist | Colon anti-cancer ** |
| **Δ9-Tetrahydrocannabinolic acid (THCA) (5)**  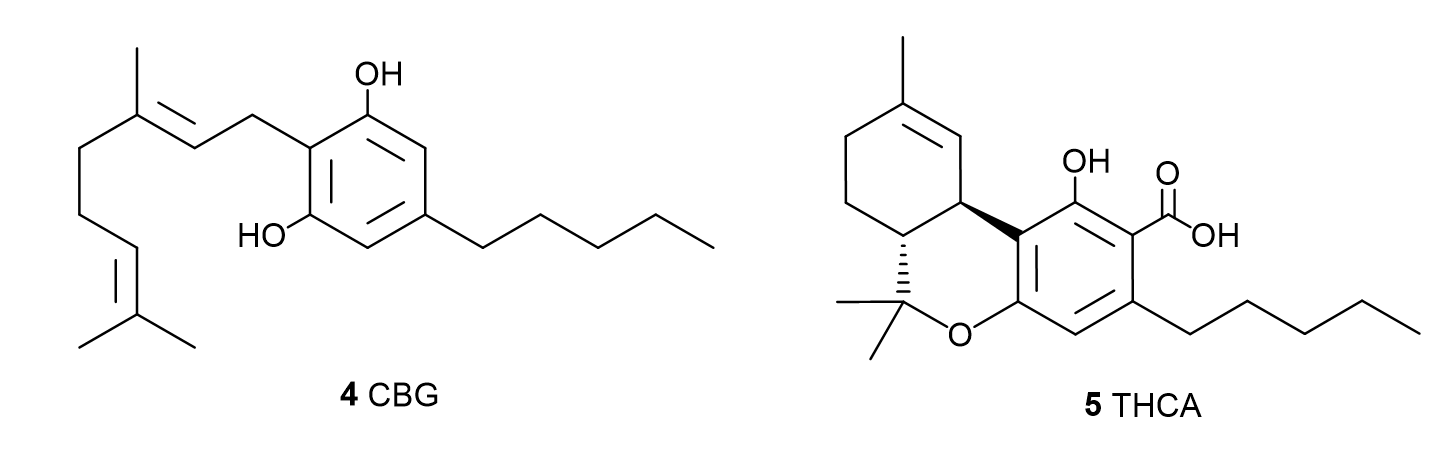**Δ9-Tetrahydrocannabinolic acid (THCA) (5)** | CB1 | Partial agonist | Anti-nociceptive **  Anti-inflammatory |
| CB2 | Agonist | Not reported |
| PPAR-*γ* | Agonist | Adiposity reduction **  Metabolic syndrome prevention **  Anti-inflammatory **  Neuroprotective *, ** |
| 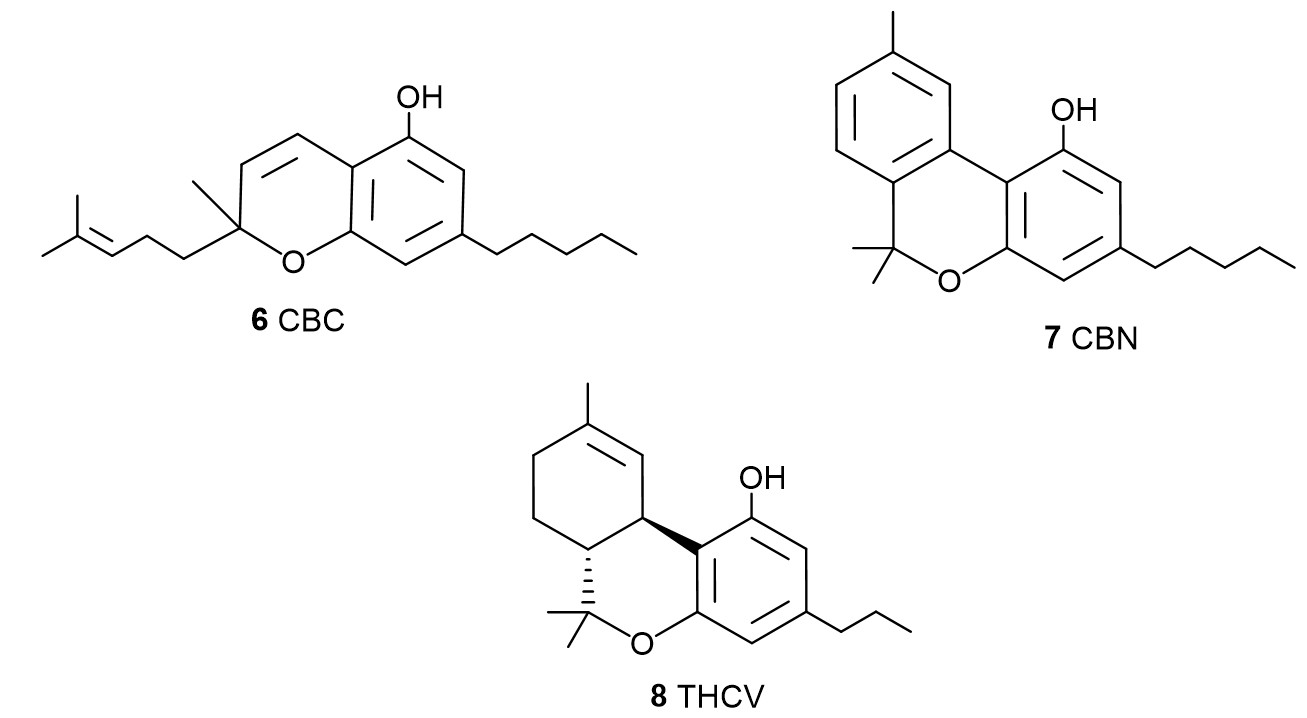  **Cannabichromene (CBC) (6)** | CB2 | Agonist | Anti-inflammatory * |
| AEA uptake | Inhibitor | Various effects related to AEA * |
| TRPV3 | Agonist | Not reported |
| TRPV4 | Agonist | Not reported |
| TRPA1 | Agonist | Anti-inflamatory **  Colitis reduction **  Analgesic ** |
| TRPM8 | Antagonist | Not reported |
| 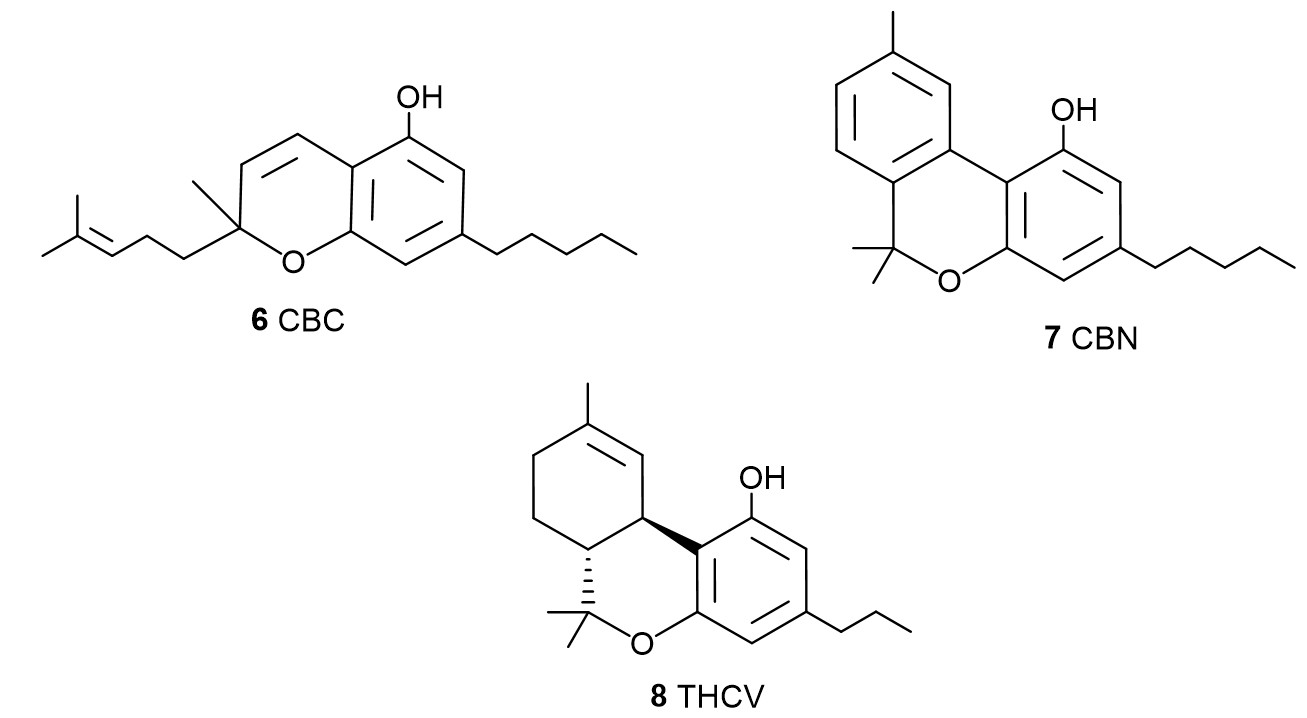 **Cannabinol (CBN) (7)** | CB1 | Agonist | Appetite increase ** |
| CB2 | Agonist  Inverse agonist | Not reported |
| TRPA1 | Agonist | Not reported |
| TRPM8 | Antagonist | Not reported |
| 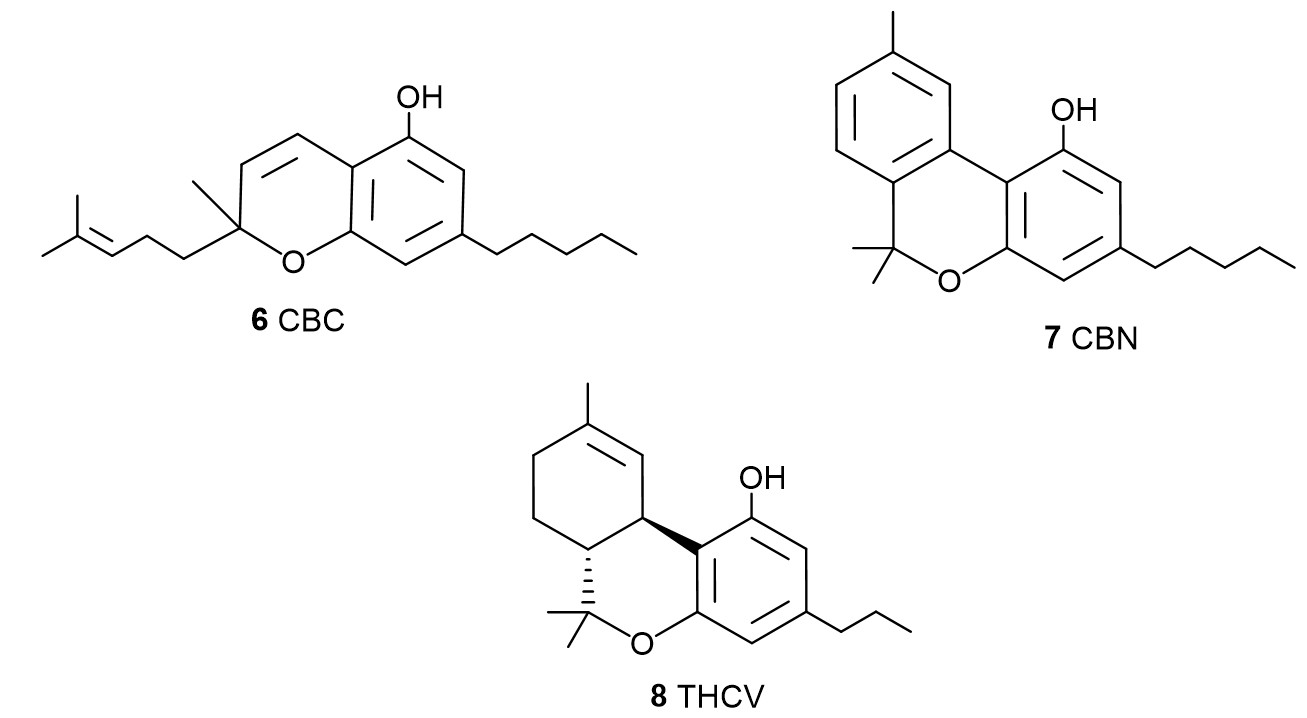  **Δ8-Tetrahydrocannabivarin (THCV) (8)**  **Δ8-Tetrahydrocannabivarin (THCV) (8)** | CB1 | Agonist  Antagonist | Anti-psychoactive (*e.g.* reverse THC-induced psychoactive effects) **  Analgesic **  Anti-convulsant **  Anti-epileptic *  Hypophagia and weight reduction **  Glycemic control improvement **, *** |
| CB2 | Partial agonist  Antagonist | Anti-inflammatory **  Inflammatory pain reduction ** |
| 5-HT-1A | Agonist | Antipsychotic *, ** |
| TRPV2 | Agonist | Not reported |
| TRPA1 | Agonist | Not reported |
| TRPM8 | Antagonist | Not reported |
| 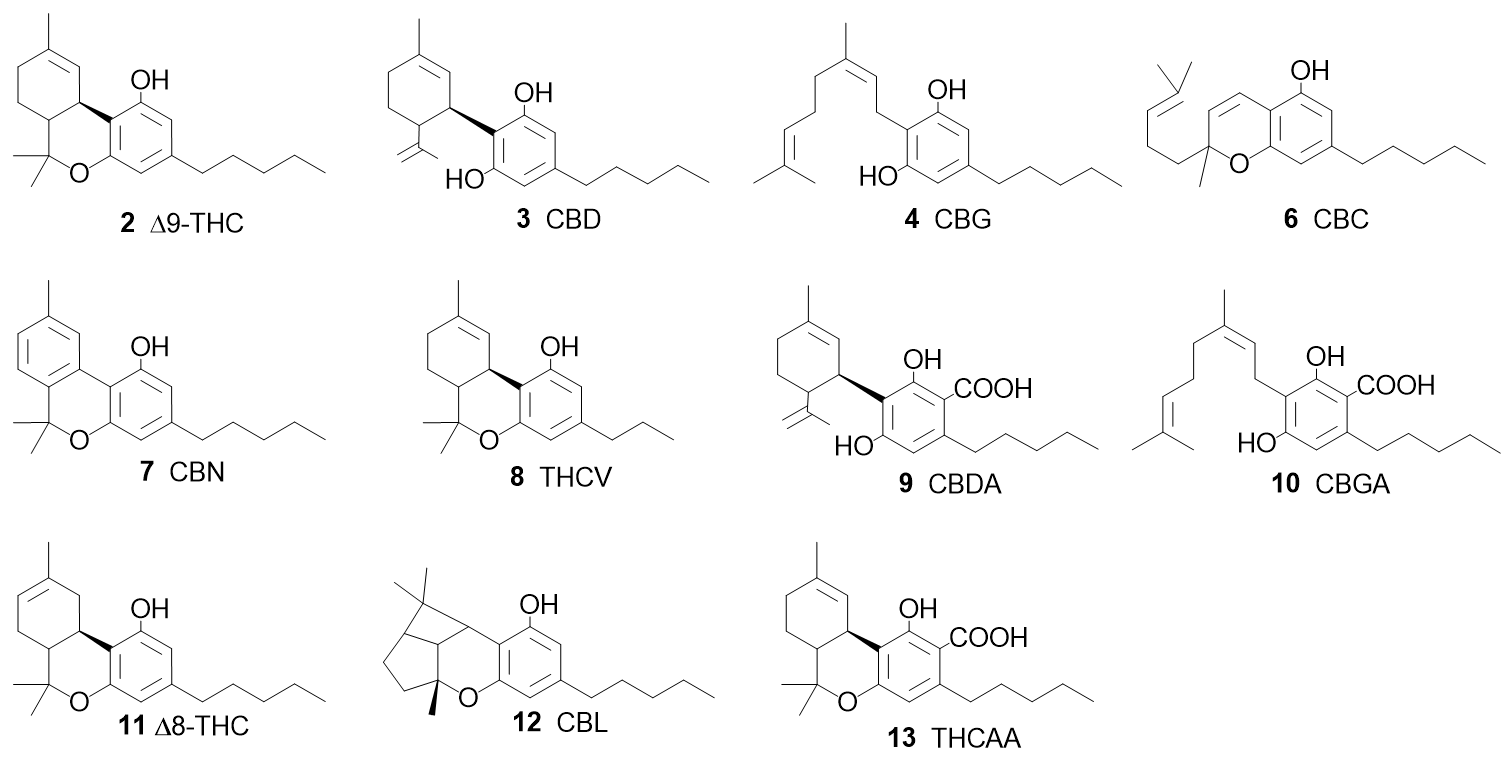  **Cannabidiolic acid (CBDA) (9)** | CB2 | Partial agonist | Not reported |
| 5-HT-1A | Agonist | Anti-emetic **  Anti-convulsant **  Anxiolytic ** |
| TRPV1 | Agonist | Anti-heperalgesic ** |
| 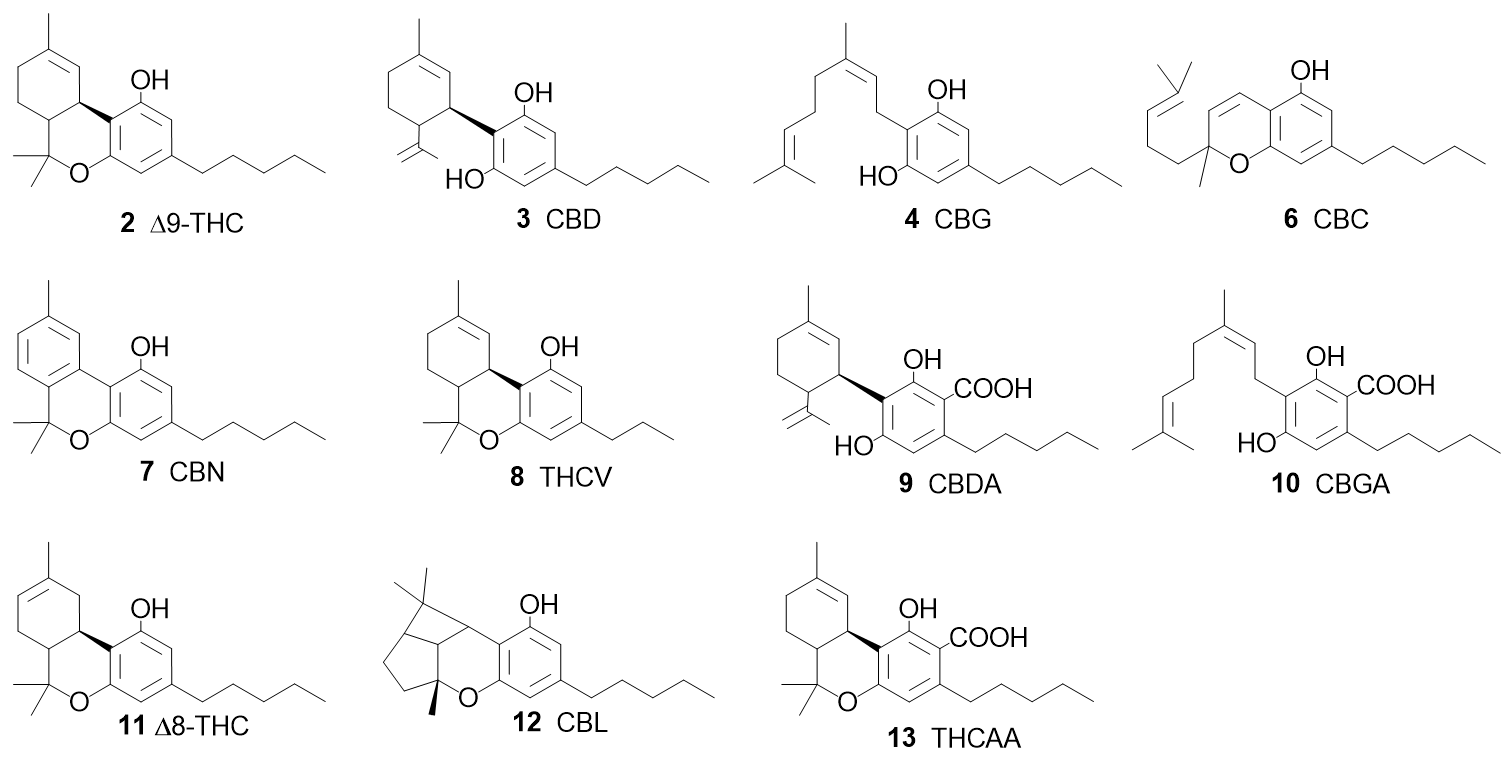  **Δ8-Tetrahydrocannabinol**  **(THC) (11)** | CB1 | Partial agonist | Appetite stimulant ** |
| CB2 | Agonist | Not reported |
| 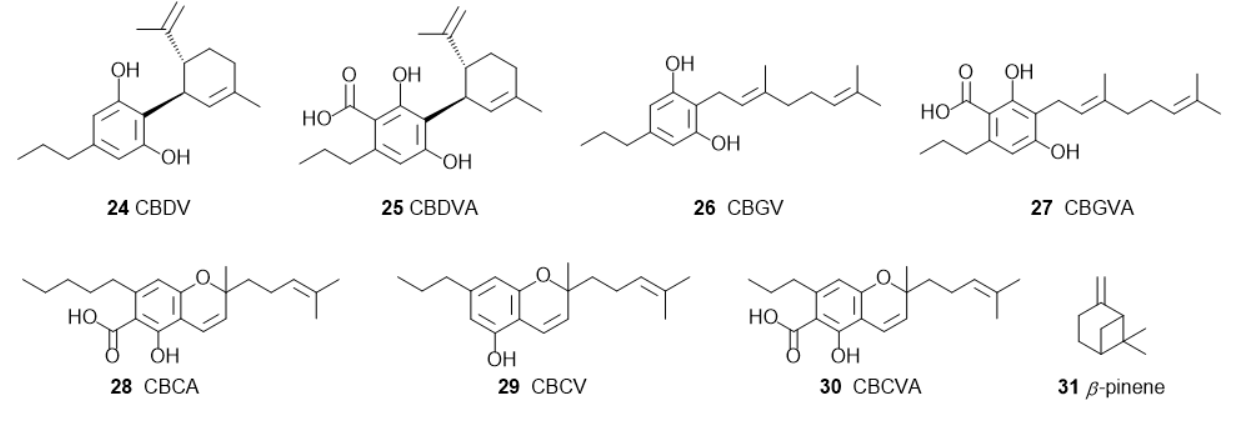  **Cannabivarin (CBDV) (24)** | GABA-A | Positive allosteric modulator | Anticonvulsive *, ***  Anti-epileptic *, *** |
| TRPV1 | Agonist | Neuronal anti-heperexcitability *  Anti-convulsant ** |
| TRPV2 | Agonist | Not reported |
| TRPV3 | Agonist | Not reported |
| TRPA1 | Agonist | Not reported |

*: Pre-clinical *in vitro* study; **: pre-clinical *in vivo* study; ***: clinical study; N.B.: This table is non-exhaustive, broadly elucidating selected compounds and some of their potential pharmacological effects currently present in the pre-clinical literature. Depending on study parameters, the compounds show differing, sometimes biphasic, affinities and effects at different targets, thus highlighting the contradictory and equivocal evidence state. **Abbreviations:** 5-hydroxytryptamine receptor 1A (5-HT-1A); 5-hydroxytryptamine receptor 3A (5-HT-3A); adrenergic receptor alpha-1 (A1A); adrenergic receptor alpha-2 (A2A); anandamide endocannabinoid (AEA); cannabinoid receptor 1 (CB1); cannabinoid receptor 2 (CB2); delta-opioid receptor (DOR); dopamine D2 receptor (D2); fatty acid amide hydrolase enzyme (FAAH); gamma-aminobutyric acid type A receptor (GABA-A); glycine receptor (GlyR); glycine receptor type *α*1 (GlyR-*α*1); glycine receptor type *α* 3 (GlyR-*α*3 ); G-protein-coupled receptor 2 (GPR2); Gprotein- coupled receptor 3 (GPR3); G-protein-coupled receptor 6 (GPR6); G-protein-coupled receptor 12 (GPR12); G-protein-coupled receptor 18 (GPR18); G-protein-coupled receptor 55 (GPR55); Mu-opioid receptor (MOR); peroxisome proliferator-activated receptor gamma (PPAR-γ); transient receptor potential cation channel type A1 (TRPA1); transient receptor potential cation channel 8 (TRPM8); transient receptor potential vanilloid type 1 (TRPV1); transient receptor potential vanilloid type 2 (TRPV2); transient receptor potential vanilloid type 3 (TRPV3); transient receptor potential vanilloid type 4 (TRPV4).

**Table S2.** Selected Cannabis sativa L.-derived terpenes, their targets, mechanisms of action, and potential resultant pharmacological effects. Table adapted from (Christensen et al., 2023)

| **Structures** | **Targets** | **Mechanisms of Action** | **Potential Pharmacological effects** |
| --- | --- | --- | --- |
| **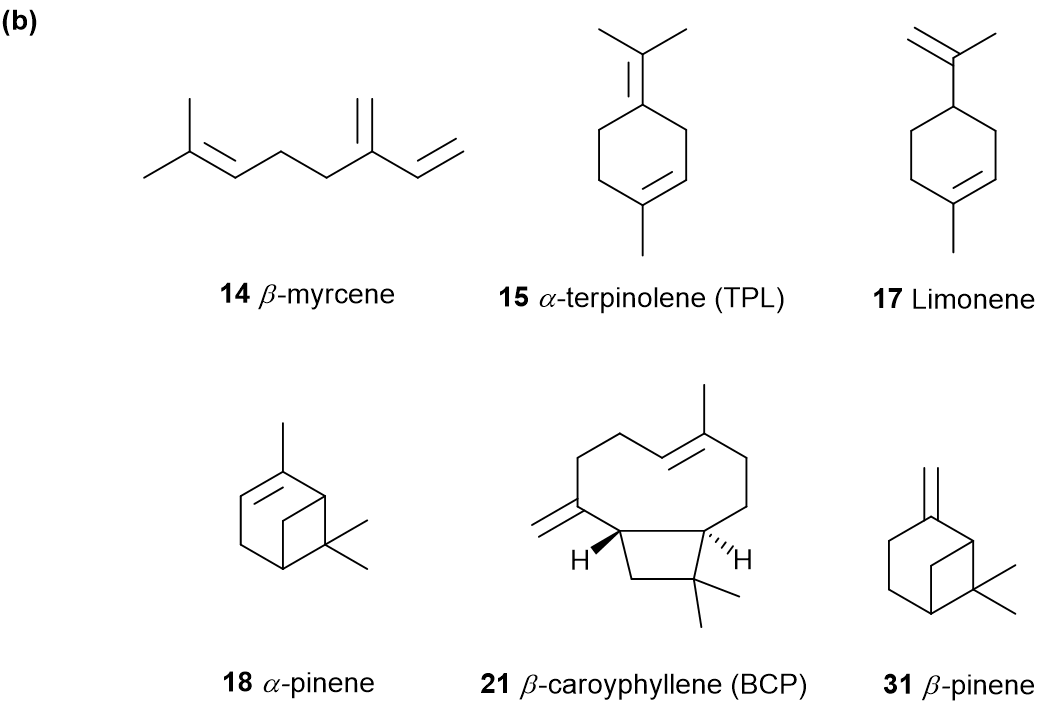**  **Myrcene (14)** | TRPV1 | Agonist | Analgesic * |
| A2A | Agonist | Analgesic ** |
| **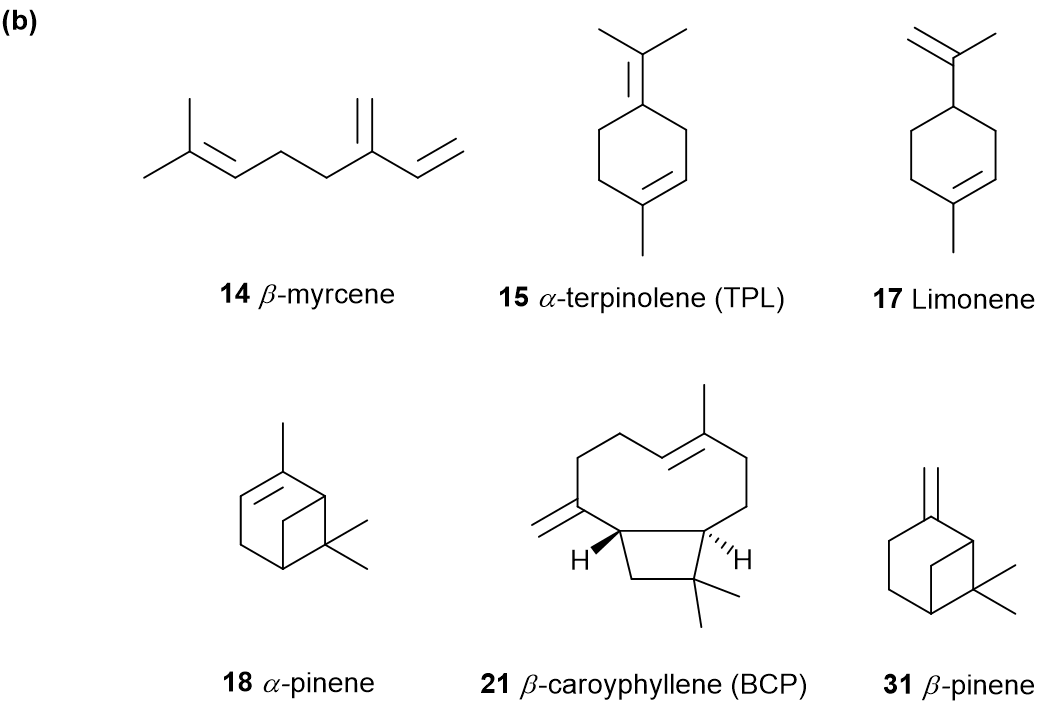**  **Limonene (17)** | 5-HT-1A | Agonist | Anti-stress **  Anxiolytic **  Anti-depressant ** |
| TRPA1 | Agonist | Analgesic ** |
| NFκB | Inhibitor | Anti-inflammatory **, ***  Analgesic **  Colitis reduction ** |
| A2A | Agonist | Not reported |
| FTase | Inhibitor | Anti-cancer ** |
| MAPK NFκB | Inhibitor | Anti-inflammatory ** |
| ERK/AKT | Agonist | Anti-cancer *, ** |
| Virus particle  (not further specified) | Inhibitor | Anti-viral * |
| **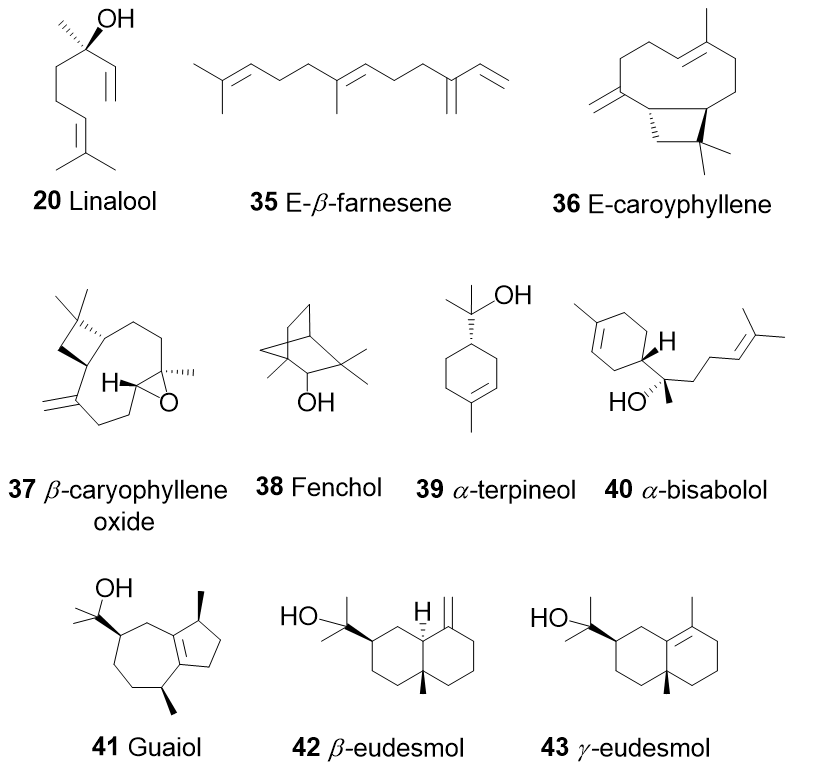**  **Linalool (20)** | A1A | Agonist | Analgesic ** |
| A2A | Agonist | Analgesic ** |
| GABA-A | Agonist | Anxiolytic ** |
| Cancer cell  (not further specified) | Inhibitor | Anti-cancer *, ** |
| **Caryophyllene (21)**  **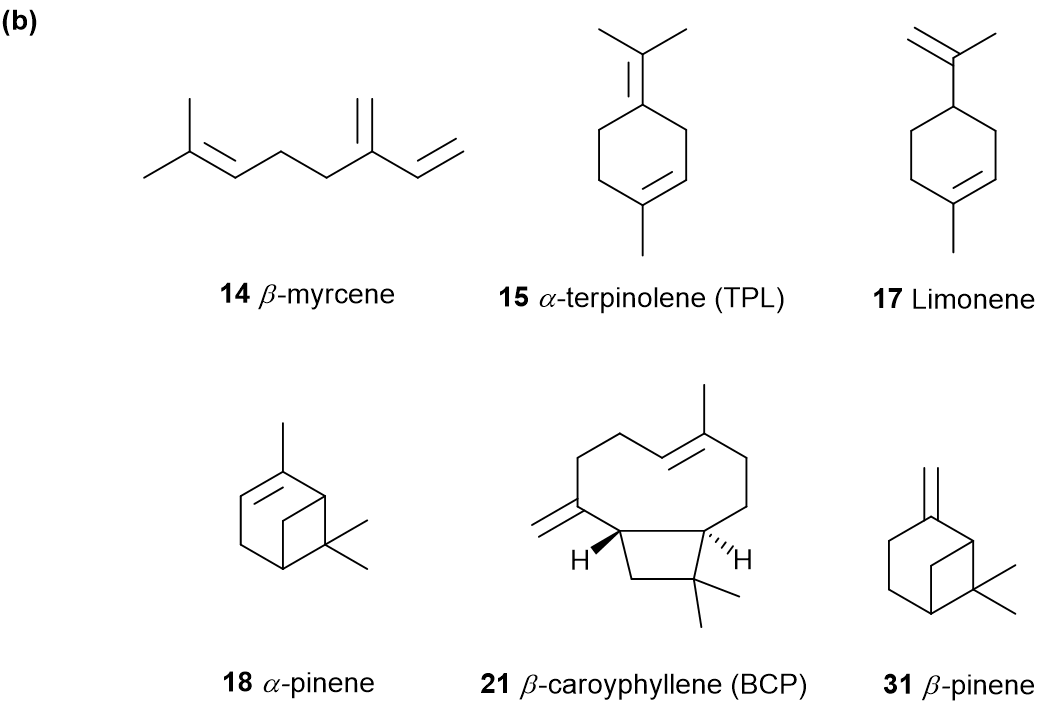**  **Caryophyllene (21)** | CB2 | Agonist | Analgesic **  Chemotherapy-induced peripheral neuropathy attenuation **  Anti-inflammatory**  Steatohepatitis protecting **  Metabolic dysregulation attenuation ** |
| PPAR-*α* | Agonist | Intracellular lipid modification*  Steatohepatitis protecting* |
| PPAR-*γ* | Agonist | Intracellular lipid modification*  Steatohepatitis protecting* |
| MAPK | Inhibitor  Agonist | Chemotherapy-induced peripheral neuropathy attenuation **  Anti-cancer * |
| TLR4 | Inhibitor | Microglial activation inhibition **  Neuroprotective *, **  Anti-inflammatory *, ** |

* Pre-clinical *in vitro* study. ** Pre-clinical *in vivo* study. *** Clinical study. N.B.: This table is non-exhaustive, broadly elucidating selected compounds and some of their potential pharmacological effects currently present in the pre-clinical literature. Depending on study parameters, the compounds show differing, sometimes biphasic, affinities and effects at different targets, thus highlighting the contradictory and equivocal evidence state. **Abbreviations**: 5-hydroxytryptamine receptor 1A (5-HT-1A); adrenergic receptor alpha-1 (A1A); adrenergic receptor alpha- 2 (A2A); cannabinoid receptor 2 (CB2); Extracellular-regulated kinase/serine/threonine kinase (ERK/AKT); farnesyltransferase (FTase); gamma-aminobutyric acid type A receptor(GABA-A); mitogen-activated protein kinase (MAPK); Nuclear factor kappa B (NFκB); peroxisome proliferator-activated receptor alpha/gamma (PPAR- *α*/γ); Toll-like receptor 4 (TLR4); transient receptor potential cation channel type A1 (TRPA1); transient receptor potential vanilloid type 1 (TRPV1).
